# Supplementary material
Source: PubMed Central journal article supplement (PMC1356344)
Supplement: 7600900s1.pdf [file 7600900s1.pdf]

# Williams\_Supplementary Figure 1

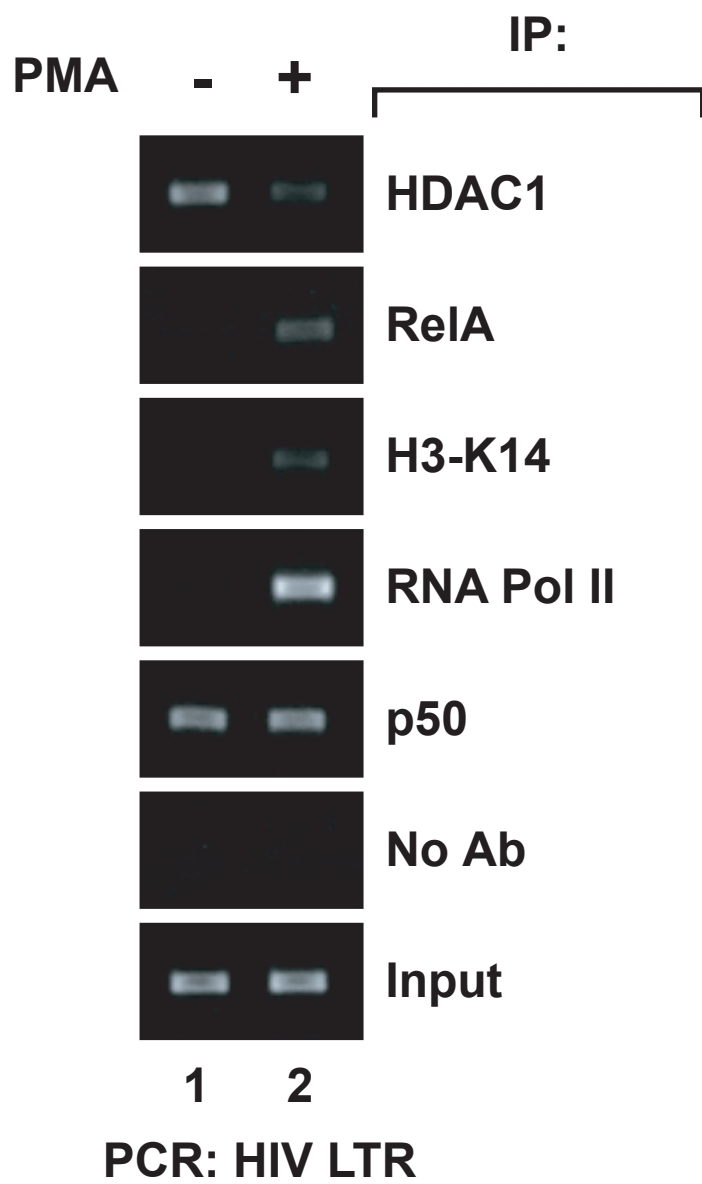

**Supplementary Figure 1.** PMA induction of NF- $\kappa$ B reduces HDAC1 association with the latent HIV LTR. Fixed chromatin extracts from J-Lat 6.3 cells treated with 20 ng/ml PMA for 30 minutes or left untreated were immunoprecipitated with the indicated antibodies. Samples were analyzed for enrichment in HIV-1 LTR DNA by UV visualization of PCR products on an ethidium bromide stained agarose gel. Patterns of transcription factor association with the HIV LTR induced by PMA are similar to those induced by TNF- $\alpha$  (Figures 3A and 4A).
