# Supplementary material
Source: PubMed Central journal article supplement (PMC1356344)
Supplement: 7600900s2.pdf [file 7600900s2.pdf]

# Williams\_Supplementary Figure 2

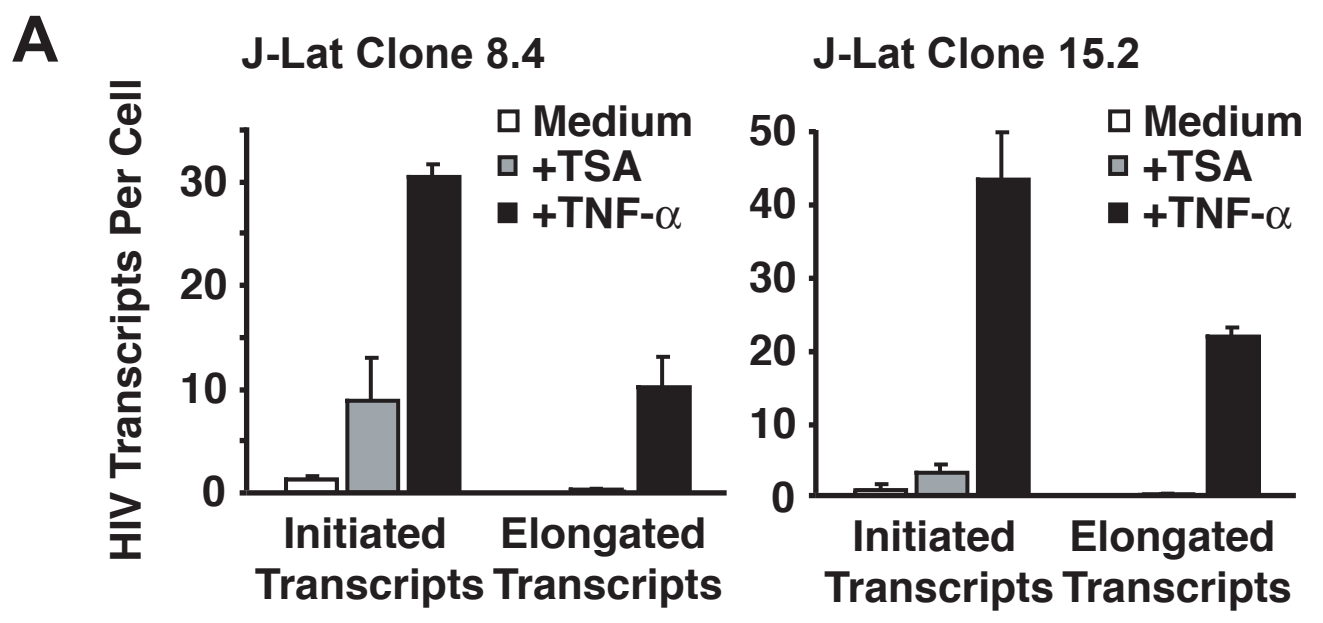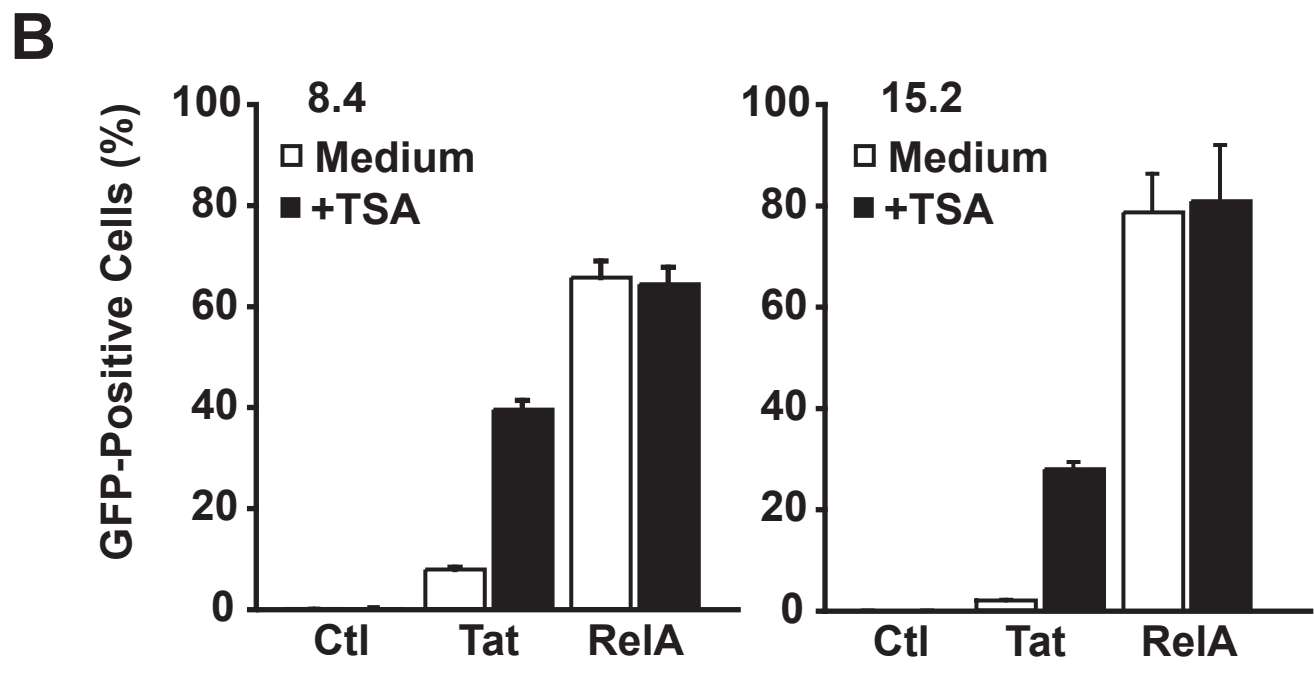

**Supplementary Figure 2.** TSA induces increased initiated HIV transcripts in J-Lat clones 8.4 and 15.2 and sensitizes to Tat transactivation of latent HIV. **(A)** Total RNA was extracted from J-Lat 8.4 or 15.4 cells treated with 20 ng/ml TNF- $\alpha$  for 30 min, TSA for 4 hrs, or untreated, and initiated or elongated HIV RNA transcripts were quantitated by real-time RT-PCR. Bars represent the mean of triplicate samples; error bars represent standard deviation. **(B)** TSA enhances Tat induction of latent HIV expression. J-Lat 8.4 (left panel) or 15.4 (right panel) cells were transfected with control-, Tat-, or RelA-expression vectors, pulse treated with TSA (400 nM) for 1 hour or left untreated, and transfected cells assessed for GFP expression 16 hours later. TSA induces initiation but not elongation of HIV RNA transcripts. Bars represent the mean of triplicate samples; error bars represent standard deviation.
